# Supplementary material for: Rehospitalization of Suicidal Adolescents in Relation to Course of Suicidal Ideation and Future Suicide Attempts
Source: Atypon-hosted journal article supplement (doi:10.1176/appi.ps.201400252), 2016-01-04
Supplement: appi.ps.201400252.ds001.pdf [file appi.ps.201400252.ds001.pdf]

 


Psychiatry Online
